# Supplementary material for: Antidepressants are modifiers of lipid bilayer properties
Source: PubMed Central journal article supplement — J Gen Physiol. 2019 Mar 4;151(3):342–56. doi: 10.1085/jgp.201812263 (PMC6400527; doi:10.1085/jgp.201812263), 2019-03-04
Supplement: JGP_201812263_sm.pdf [file JGP_201812263_sm.pdf]

## Supplemental material

Kapoor et al., <https://doi.org/10.1085/jgp.201812263>

### Estimating the AD partition coefficient into lipid bilayers

Solute binding to lipid bilayers can be described using different frameworks (Peitzsch and McLaughlin, 1993; Heerklotz and Blume, 2012): as partitioning between two immiscible phases (e.g., White et al., 1998), where the solute (drug) concentration in the lipid phase ( $[\text{Drug}]_L$ , in moles/volume) is related to the aqueous drug concentration ( $[\text{Drug}]_W$ , in moles/volume) by a dimensionless partition coefficient ( $K_1$ ):

$$[\text{Drug}]_L = K_1 \cdot [\text{Drug}]_W; \quad (\text{S1})$$

or as adsorption to the bilayer/electrolyte interface (e.g., Ketterer et al., 1971), where the surface drug concentration in the lipid phase ( $\{\text{Drug}\}_L$ , in moles/area) is related to the aqueous drug concentration by an adsorption coefficient with units of length ( $K_2$ ):

$$\{\text{Drug}\}_L = K_2 \cdot [\text{Drug}]_W. \quad (\text{S2})$$

Binding to the bilayer also can be described using a molar partition coefficient (e.g., Tamm, 1991), where the molar ratio of the drug in the membrane ( $x_{\text{Drug}} = [\text{Drug}]_L / [\text{Lipid}]_L$ , where  $[\text{L}]_L$  is the concentration of lipid in the membrane phase) is related to the aqueous drug concentration by a partition coefficient with units of  $\text{M}^{-1}$  ( $K_3$ ):

$$x_{\text{Drug}} = K_3 \cdot [\text{Drug}]_W. \quad (\text{S3})$$

Antidepressants, being hydrophobic primary, secondary, or tertiary amines, will be membrane permeant (e.g., Bean et al., 1968; Yu et al., 2016) and partition into both the extravascular and intravesicular leaflets, and  $K_1$ ,  $K_2$ , and  $K_3$  will be related as

$$K_1 = K_2 \cdot 2/d_0 = K_3/v_L, \quad (\text{S4})$$

where  $v_L$  denotes the molar volume of the lipid.

### Basic distribution relations

The total amount of drug in the system ( $\langle \text{Drug} \rangle_T$ ) is given by (e.g., Bruno et al., 2007; Heerklotz and Keller, 2013):

$$\langle \text{Drug} \rangle_T = [\text{Drug}]_{\text{nom}} \cdot V_W = [\text{Drug}]_W \cdot V_W + [\text{Drug}]_L \cdot V_L = [\text{Drug}]_W \cdot (V_W + K_1 \cdot V_L) \quad (\text{S5a})$$

or

$$\langle \text{Drug} \rangle_T = [\text{Drug}]_{\text{nom}} \cdot V_W = [\text{Drug}]_W \cdot V_W + \{\text{Drug}\}_L \cdot A_L = [\text{Drug}]_W \cdot (V_W + K_2 \cdot A_L), \quad (\text{S5b})$$

where  $[\text{Drug}]_{\text{nom}}$  is the nominal drug concentration in the system, and  $V_W$ ,  $V_L$ , and  $A_L$  denote the volumes of the aqueous and lipid phases and the surface area of the lipid phase (the sum of the areas of the two leaflets). When  $V_L/V_W \ll 1$  (or  $d_0 \cdot A_L/2 \cdot V_W \ll 1$ ), the system volume can be approximated as  $V_W$ , in which case:

$$[\text{Drug}]_W = [\text{Drug}]_{\text{nom}} \cdot \frac{V_W}{(V_W + K_1 \cdot V_L)} = \langle \text{Drug} \rangle_T \cdot \frac{1}{(V_W + K_1 \cdot V_L)} \quad (\text{S6a})$$

or

$$[\text{Drug}]_W = [\text{Drug}]_{\text{nom}} \cdot \frac{V_W}{(V_W + K_2 \cdot A_L)} = \langle \text{Drug} \rangle_T \cdot \frac{1}{(V_W + K_2 \cdot A_L)} \quad (\text{S6b})$$

and

$$[\text{Drug}]_L = K_1 \cdot [\text{Drug}]_W = [\text{Drug}]_{\text{nom}} \cdot \frac{K_1 \cdot V_W}{(V_W + K_1 \cdot V_L)} = \langle \text{Drug} \rangle_T \cdot \frac{K_1}{(V_W + K_1 \cdot V_L)} \quad (\text{S7a})$$

or

$$\{\text{Drug}\}_L = K_2 \cdot [\text{Drug}]_W = [\text{Drug}]_{\text{nom}} \cdot \frac{K_2 \cdot V_W}{(V_W + K_2 \cdot A_L)} = \langle \text{Drug} \rangle_T \cdot \frac{K_2}{(V_W + K_2 \cdot A_L)}, \quad (\text{S7b})$$

and the total amount of drug in the lipid phase ( $\langle \text{Drug} \rangle_L = [\text{Drug}]_L \cdot V_L = \{\text{Drug}\}_L \cdot A_L$ ) is given by

$$\langle \text{Drug} \rangle_L = \langle \text{Drug} \rangle_T \cdot \frac{K_1 \cdot V_L}{(V_W + K_1 \cdot V_L)} = \langle \text{Drug} \rangle_T \cdot \frac{K_2 \cdot A_L}{(V_W + K_2 \cdot A_L)} \quad (\text{S8})$$

In the case of charged drugs, it becomes convenient to quantify drug binding using  $K_2$  as the measure of the solute's affinity for the bilayer-solution interface. For comparison with cLogP estimates of hydrophobicity, we will convert to  $K_1$  using Eq. S4.

### Determining $K_2$

To determine  $K_2$ , the amount of lipid in the system is increased by adding  $n$  aliquots (volume  $\delta V$ ) of a suspension of lipid vesicles to the system, which produces a shift of drug from the aqueous phase to the lipid phase.  $K_2$ , then, can be determined by monitoring how the shift from the aqueous to the lipid phase varies as function of the amount of added lipid.

The surface area of added lipid in each aliquot ( $\delta A_L$ ) is given by:

$$\delta A_L = \delta V \cdot C_L \cdot a_L, \quad (\text{S9})$$

where  $C_L$  denotes the lipid concentration in the aliquot and  $a_L$  is the molar area of the lipid. After the  $i$ th injection, the drug concentration in the aqueous phase ( $[\text{Drug}]_W(i)$ ), and the amount of drug in the lipid and aqueous phase ( $\langle \text{Drug} \rangle_L(i)$ ) are:

$$[\text{Drug}]_W(i) = \langle \text{Drug} \rangle_T \cdot \frac{1}{V_W + i \cdot \delta V \cdot (1 + K_2 \cdot C_L \cdot a_L)}, \quad (\text{S10})$$

$$\langle \text{Drug} \rangle_L(i) = K_2 \cdot i \cdot \delta V \cdot C_L \cdot a_L \cdot [\text{Drug}]_W = \langle \text{Drug} \rangle_T \cdot \frac{K_2 \cdot i \cdot \delta V \cdot C_L \cdot a_L}{V_W + i \cdot \delta V \cdot (1 + K_2 \cdot C_L \cdot a_L)}, \quad (\text{S11})$$

where  $V_W$  denotes the initial volume of the system.

### Partitioning of charged drugs

In the case of charged drugs, drug partitioning into the membrane will give rise to a surface charge ( $\sigma$ ), which in turn will establish a surface potential ( $\phi_0$ ), and the aqueous drug concentration at the interface ( $[\text{Drug}]_0$ ) will differ from the bulk  $[\text{Drug}]_W$  (McLaughlin and Harary, 1976):

$$[\text{Drug}]_0 = \exp\left\{-\frac{z_{\text{Drug}} \cdot F \cdot \phi_0}{RT}\right\} [\text{Drug}]_W, \quad (\text{S12})$$

where  $z_{\text{Drug}}$  denotes the drug valence,  $F$  is Faraday's constant,  $R$  the gas constant, and  $T$  the temperature in degrees kelvin. This impacts drug partitioning, because

$$\langle \text{Drug} \rangle_L = K_2 \cdot [\text{Drug}]_0 = K_2 \cdot \exp\left\{-\frac{z_{\text{Drug}} \cdot F \cdot \phi_0}{RT}\right\} \cdot [\text{Drug}]_W. \quad (\text{S13})$$

The effective adsorption coefficient after  $i$  injections ( $K_2^{\text{eff}}(i)$ ) thus becomes

$$K_2^{\text{eff}}(i) = K_2 \cdot \exp\left\{-\frac{z_{\text{Drug}} \cdot F \cdot \phi_0(i)}{RT}\right\} = K_2 \cdot \exp\{-\beta \cdot \phi_0(i)\}, \quad (\text{S14})$$

where  $\beta = z_{\text{Drug}} \cdot F/RT$  and  $\phi_0(i)$  is the surface potential after the  $i$ th injection.

Combining Eqs. S11 and S14,

$$\langle \text{Drug} \rangle_L(i) = \langle \text{Drug} \rangle_T \cdot \frac{K_2 \cdot \exp\{-\beta \cdot \phi_0(i)\} \cdot i \cdot \delta V \cdot C_L \cdot a_L}{V_W + i \cdot \delta V \cdot (1 + K_2 \cdot \exp\{-\beta \cdot \phi_0(i)\} \cdot C_L \cdot a_L)}. \quad (\text{S15})$$

The total surface area of the system ( $A_T$ ) will be the sum of the area due to the lipid ( $A_L$ )

$$A_L = \langle \text{Lipid} \rangle_L \cdot a_L = i \cdot \delta V \cdot C_L \cdot a_L \quad (\text{S16})$$

and the area due to the drug ( $A_D$ )

$$A_D = \langle \text{Drug} \rangle_L \cdot a_D. \quad (\text{S17})$$

After the  $i$ th injection, the total membrane area ( $A(i)_T$ ) becomes

$$A_T(i) = i \cdot \delta V \cdot C_L \cdot a_L \cdot (1 + \frac{\langle \text{Drug} \rangle_L(i) \cdot a_D}{i \cdot \delta V \cdot C_L \cdot a_L}). \quad (\text{S18})$$

$\phi_0$  can be estimated using the Gouy-Chapman theory (Aveyard and Haydon, 1973). For univalent electrolytes:

$$\sigma = F \cdot z_{\text{Drug}} \cdot \langle \text{Drug} \rangle_L = \kappa \cdot \sqrt{C_S} \cdot \sinh\left\{\frac{\beta \cdot \phi_0}{2}\right\}, \quad (\text{S19})$$

where  $\kappa = \sqrt{\beta \cdot RT \cdot \epsilon \cdot \epsilon_0 \cdot 1,000}$ ,  $\epsilon$  is the dielectric constant,  $\epsilon_0$  the permittivity of free space, and  $C_S$  the total concentration of univalent salt (the factor 1,000 converts concentrations in moles/liter to moles/m<sup>3</sup>). Combining Eqs. S10 and S13–S19:

$$\sigma(i) = F \cdot z_{\text{Drug}} \cdot \langle \text{Drug} \rangle_T \cdot \frac{K_2 \cdot \exp\{-\beta \cdot \phi_0(i)\}}{V_W + i \cdot \delta V \cdot (1 + K_2 \cdot \exp\{-\beta \cdot \phi_0(i)\}) \cdot C_L \cdot a_L} \cdot f(i), \quad (\text{S20})$$

where  $\sigma(i)$  is the surface charge density after the  $i$ th injection and  $f(i)$  is given by

$$f(i) = \frac{1}{1 + \frac{\langle \text{Drug} \rangle_L \cdot a_D}{i \cdot \delta V \cdot C_L \cdot a_L}} \quad (\text{S21})$$

$$= \frac{V_W + i \cdot \delta V \cdot (1 + K_2 \cdot \exp\{-\beta \cdot \phi_0(i)\}) \cdot C_L \cdot a_L}{V_W + i \cdot \delta V \cdot (1 + K_2 \cdot \exp\{-\beta \cdot \phi_0(i)\}) \cdot C_L \cdot a_L + \langle \text{Drug} \rangle_T \cdot K_2 \cdot \exp\{-\beta \cdot \phi_0(i)\} \cdot a_D}$$

and, cf. Eq. S19,

$$\phi_0(i) = \frac{2}{\beta} \cdot \sinh^{-1}\left\{\frac{\sigma(i)}{\kappa \cdot \sqrt{C_S}}\right\}. \quad (\text{S22})$$

### Enthalpy of partitioning and determining $K_2$

The amount of drug that has transferred from the aqueous phase to the lipid phase can be determined using ITC (Seelig et al., 1993; Wenk et al., 1997; Heerklotz and Seelig, 2000; Tan et al., 2002). The integrated enthalpy of partitioning in injections 1 through  $i$  ( $\Sigma h_{\text{Drug}}(i)$ ) is given by cf. Eq. S15:

$$\Sigma h_{\text{Drug}}^{W \rightarrow L}(i) = H_{\text{Drug}}^{W \rightarrow L} \cdot \langle \text{Drug} \rangle_L(i) \quad (\text{S23})$$

$$= H_{\text{Drug}}^{W \rightarrow L} \cdot \langle \text{Drug} \rangle_T \cdot \frac{K_2 \cdot \exp\{-\beta \cdot \phi_0(i)\} \cdot i \cdot \delta V \cdot C_L \cdot a_L}{V_W + i \cdot \delta V \cdot (1 + K_2 \cdot \exp\{-\beta \cdot \phi_0(i)\}) \cdot C_L \cdot a_L},$$

where  $H_{\text{Drug}}^{W \rightarrow L}$  is the molar enthalpy of drug partitioning into the lipid phase. Combining Eqs. S20 and S23:

$$\sigma(i) = \frac{z_{\text{Drug}} \cdot F \cdot \langle \text{Drug} \rangle_L(i)}{i \cdot \delta V \cdot C_L \cdot a_L} = \frac{z_{\text{Drug}} \cdot F \cdot \Sigma h_{\text{Drug}}^{W \rightarrow L}(i)}{i \cdot \delta V \cdot C_L \cdot a_L \cdot H_{\text{Drug}}^{W \rightarrow L}} \cdot f(i), \quad (\text{S24})$$

where  $f(i)$ , cf. Eq. S21, can be expressed in terms of  $\Sigma h_{\text{Drug}}^{W \rightarrow L}(i)$  and  $H_{\text{Drug}}^{W \rightarrow L}$ :

$$f(i) = \frac{i \cdot \delta V \cdot C_L \cdot a_L}{i \cdot \delta V \cdot C_L \cdot a_L + \frac{\Sigma h_{\text{Drug}}^{W \rightarrow L}(i)}{H_{\text{Drug}}^{W \rightarrow L}} \cdot a_D}, \quad (\text{S25})$$

and

$$\sigma(i) = \frac{z_{\text{Drug}} \cdot F \cdot \Sigma h_{\text{Drug}}^{W \rightarrow L}(i)}{i \cdot \delta V \cdot C_L \cdot a_L \cdot H_{\text{Drug}}^{W \rightarrow L} + \Sigma h_{\text{Drug}}^{W \rightarrow L}(i) \cdot a_D}. \quad (\text{S26})$$

Combining Eqs. S19 and S26,

$$\frac{z_{\text{Drug}} \cdot F \cdot \Sigma h_{\text{Drug}}^{W \rightarrow L}(i)}{i \cdot \delta V \cdot C_L \cdot a_L \cdot H_{\text{Drug}}^{W \rightarrow L} + \Sigma h_{\text{Drug}}^{W \rightarrow L}(i) \cdot a_D} = \kappa \cdot \sqrt{C_S} \cdot \sinh\left\{\frac{\beta \cdot \phi_0(i)}{2}\right\}, \quad (\text{S27})$$

or

$$\phi_0(i) = \frac{2}{\beta} \cdot \arcsin\left\{\frac{z_{\text{Drug}} \cdot F \cdot \Sigma h_{\text{Drug}}^{W \rightarrow L}(i)}{\kappa \cdot \sqrt{C_S} \cdot i \cdot \delta V \cdot C_L \cdot a_L \cdot H_{\text{Drug}}^{W \rightarrow L} + \Sigma h_{\text{Drug}}^{W \rightarrow L}(i) \cdot a_D}\right\}. \quad (\text{S28})$$

Eqs. S23 and S28 allow for estimating  $K_2$  and  $H_{\text{Drug}}^{W \rightarrow L}$  from the experimental  $\Sigma h_{\text{Drug}}(i)$  versus  $i$  relation. Initial estimates for  $K_2$  and  $H_{\text{Drug}}^{W \rightarrow L}$  were obtained from the experimental  $\Sigma h_{\text{Drug}}^{W \rightarrow L}(i) - i$  relations setting  $z_{\text{Drug}} = 0$ . Using these estimates as initial guesses, one can construct a 1 by  $n$  array ( $n$  being the total number of injections) of surface charge densities after each injection:  $\{\sigma(1), \dots, \sigma(i), \dots, \sigma(n)\}$ , where  $\sigma(i)$  is calculated using Eq. S24 and a 1 by  $n$  array of surface potentials after each injection  $\{\phi_0(1), \dots, \phi_0(i), \dots, \phi_0(n)\}$ , where

$\phi_0(i)$  is calculated using Eq. S28. Using the new estimates for  $\phi_0(i)$  in Eq. S23, we obtain new estimates for  $\Sigma h_{\text{Drug}}^{W \rightarrow L}(i)$ , denoted  $\Sigma h_{\text{Drug}}^{W \rightarrow L^*}(i)$ , and  $\sigma(i)$ , cf. Eq. S24, and  $K_2$  and  $H_{\text{Drug}}^{W \rightarrow L}$  can be estimated using non-linear least squares fitting that minimizes  $\sum_1 (\Sigma h_{\text{Drug}}^{W \rightarrow L}(i) - \Sigma h_{\text{Drug}}^{W \rightarrow L^*}(i))^2$ .

### Drug surface density and mole fraction in the bilayer

Knowing  $K_2$ , the surface density and mole fraction ( $m_{\text{Drug}}$ ) of the drug in the bilayer, as well as  $[\text{Drug}]_W$ , can be estimated for any  $[\text{Drug}]_{\text{nom}}$  as (cf. Eqs. S20 and S21):

$$\{\text{Drug}\}_L = \frac{\langle \text{Drug} \rangle_T \cdot K_2 \cdot \exp\{-\beta \cdot \phi_0\}}{V_W + K_2 \cdot \exp\{-\beta \cdot \phi_0\} \cdot (\langle \text{Lipid} \rangle_T \cdot a_L + \langle \text{Drug} \rangle_T \cdot a_D)}, \quad (\text{S29})$$

$$m_{\text{Drug}} = \frac{\{\text{Drug}\}_L}{\{\text{Drug}\}_L + \{\text{Lipid}\}_L} = \frac{\{\text{Drug}\}_L}{\{\text{Drug}\}_L + \{\text{Lipid}\}_L} \cdot (1 - \{\text{Drug}\}_L \cdot a_D / a_L) \quad (\text{S30})$$

and

$$[\text{Drug}]_W = \frac{\langle \text{Drug} \rangle_T - \{\text{Drug}\}_L \cdot (\langle \text{Lipid} \rangle_T \cdot a_L + \langle \text{Drug} \rangle_T \cdot a_D)}{V_W} \quad (45)$$

$$= \frac{\langle \text{Drug} \rangle_T}{V_W + K_2 \cdot \exp\{-\beta \cdot \phi_0\} \cdot (\langle \text{Lipid} \rangle_T \cdot a_L + \langle \text{Drug} \rangle_T \cdot a_D)},$$

where  $\{\text{Lipid}\}_L$  denotes the lipid surface density in the absence of drug binding,  $\{\text{Lipid}\}_L = 1/a_L$ .

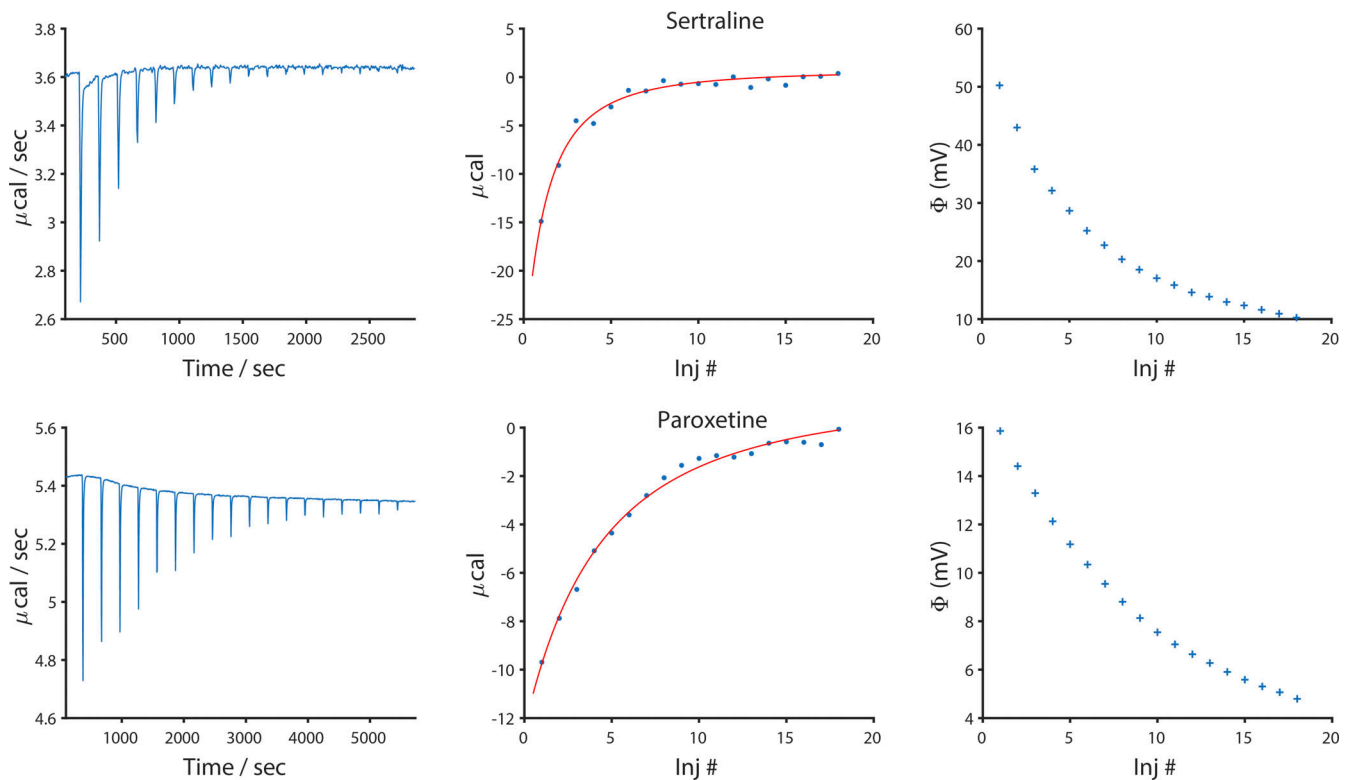

Figure S1. **Determining partition coefficients from ITC experiments.** Results for sertraline, which has the highest partition coefficient and paroxetine, which has a low partition coefficient. Left: ITC traces. Middle: Integrated heats,  $\Sigma h_{\text{Drug}}^{W \rightarrow L}(i)$ , versus injection number. Right: The estimated surface potential (from Eqs. S26 and S28), which decreases as more lipid is added to the system.

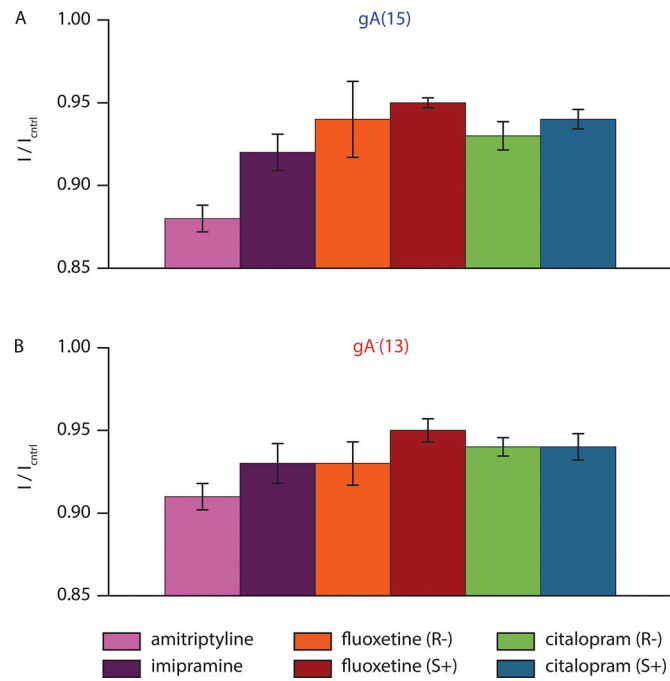

Figure S2. **Effect of antidepressants on the conductances of  $gA^{-}(13)$  and  $AgA(15)$  channels.** (A) AD-induced decreases in  $AgA(15)$  single-channel conductances. (B) AD-induced decreases in  $A^{-}(13)$  single-channel conductances. Results are shown only for the highest drug concentrations tested (250  $\mu$ M for the citalopram enantiomers and 100  $\mu$ M for the other four compounds). Values represent mean  $\pm$  SE;  $n \geq 3$ .

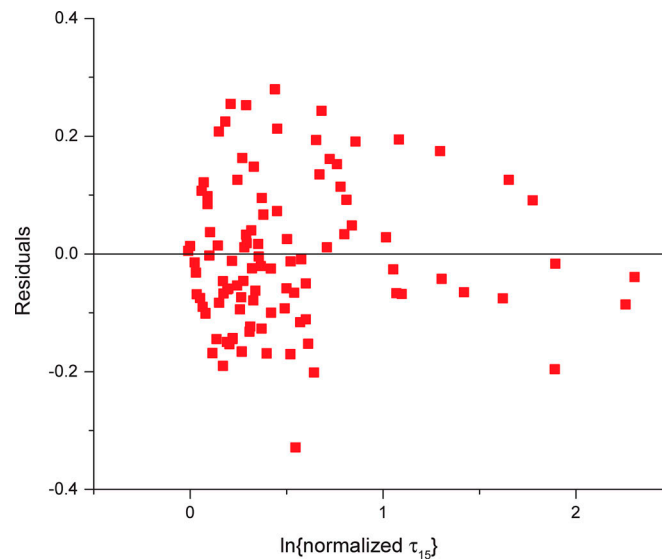

Figure S3. **The residuals from the straight line fit to the results in Fig. 8 A.** Plot of the residuals ( $Y_{fit} - Y$ ) from the least-squares fit to the  $\ln\{\text{normalized } \tau_{15}\}$  as a linear function of  $\ln\{\text{normalized } \tau_{15}\}$ .

Table S1: TCAs and SSRIs inhibit many membrane proteins: A survey of IC50s

The color codes for the entries below are:

|  |                           |  |                             |  |                              |
|--|---------------------------|--|-----------------------------|--|------------------------------|
|  | $< 1 \mu\text{M}$         |  | $10\text{-}100 \mu\text{M}$ |  | Inhibition; no dose-response |
|  | $1\text{-}10 \mu\text{M}$ |  | $> 100 \mu\text{M}$         |  | No effect                    |

| Membrane Protein                               |                                        | TCAs         |             |               |               |            |             | SSRIs   |            |               |            |            |             |            |            |
|------------------------------------------------|----------------------------------------|--------------|-------------|---------------|---------------|------------|-------------|---------|------------|---------------|------------|------------|-------------|------------|------------|
|                                                |                                        | Clomipramine | Lofepramine | Amitriptyline | Nortriptyline | Imipramine | Desipramine | Doxepin | Fluoxetine | Norfluoxetine | Sertraline | Paroxetine | Fluvoxamine | Citalopram | Zimelidine |
| <b>Voltage-gated channels</b>                  | Kv1.1 <sup>1</sup>                     |              |             | 22            |               |            |             |         | 55         |               |            |            |             |            |            |
|                                                | Kv1.3 <sup>2</sup>                     |              |             |               |               |            |             | 6       | 1.4        |               |            |            |             |            |            |
|                                                | Kv1.4 <sup>3</sup>                     |              |             |               |               |            |             | 33      |            |               |            |            |             |            |            |
|                                                | Kv1.5 <sup>4</sup>                     |              |             |               |               |            |             |         |            | 0.7           |            | 2          | 3           |            |            |
|                                                | Kv3.1 <sup>5</sup>                     |              |             |               |               |            |             | 13      | 0.8        |               |            |            |             |            |            |
|                                                | Kv7.2/7.3 <sup>6</sup>                 |              |             | 10            |               |            |             |         |            |               |            |            |             |            |            |
|                                                | hERG (Kv 11.1) <sup>7</sup>            |              |             | 5-23          |               |            | 12-50       |         | 1          | 2             |            |            | 4           |            |            |
|                                                | L/T-type Ca <sup>2+</sup> <sup>8</sup> | 12           |             | 4-70          |               | 4-30       | 12          | 3-30    | 1-5        | 2             |            |            |             | 60-65      |            |
|                                                | Proton channel <sup>9</sup>            |              |             | 5.8           |               | 5.7        |             | 2.1     |            |               |            |            |             |            |            |
|                                                | Nav (inactivated) <sup>10</sup>        |              |             | 0.2-56        | 0.3-63        | 1-68       | 1           |         | 1.3        |               |            | 1.5        |             |            | 12         |
| Nav (resting) <sup>11</sup>                    |                                        |              | 90          | 30            | 40            | 20         |             | 49-70   |            |               | 9-20       |            | 100-174     |            |            |
| <b>Inward Rectifier K<sup>+</sup> channels</b> | GIRK (Kir 3) <sup>12</sup>             | 40           |             | 110           | 130           | 50         | 40          | 20      |            |               | 14         | NE         | NE          | NE         |            |
|                                                | Kir 4.1 <sup>13</sup>                  |              |             | 62            | 16            | 98         | 55          | 15      |            | 7             |            | 196        |             |            |            |

Table S1 (continued)

| Membrane Protein             |                                                       | TCAs         |             |               |               |             |             | SSRIs       |            |               |            |            |             |            |            |
|------------------------------|-------------------------------------------------------|--------------|-------------|---------------|---------------|-------------|-------------|-------------|------------|---------------|------------|------------|-------------|------------|------------|
|                              |                                                       | Clomipramine | Lofepramine | Amitriptyline | Nortriptyline | Imipramine  | Desipramine | Doxepin     | Fluoxetine | Norfluoxetine | Sertraline | Paroxetine | Fluvoxamine | Citalopram | Zimelidine |
| <b>Ligand-gated channels</b> | GABA <sub>A</sub> receptors <sup>14</sup>             |              |             |               |               |             |             | 130         | 1          |               |            |            |             |            |            |
|                              | NMDA receptors <sup>15</sup>                          |              | NDR         | 14-57         |               | NDR         | 1-7         | 10-<br>>100 |            |               |            |            | 180         |            |            |
|                              | AMPA receptors <sup>16</sup>                          |              |             | >300          |               |             | >100        | 36-43       |            |               |            |            | >300        |            |            |
|                              | nACh receptors <sup>17</sup>                          | <10          |             | 0.9-<br><10   | 0.1-<br><10   | <10         | ~0.3        | 7-16        | <10        | <10           | 0.8-<br>21 | 1.5-<br>23 |             | 0.9-3      | >10        |
|                              | TRPV1 <sup>18</sup>                                   |              |             | 60            |               |             |             |             |            |               |            |            |             |            |            |
|                              | α adrenoceptors <sup>19</sup>                         |              |             | 6-8           | 6-7.5         | 6-7         |             |             |            |               |            |            |             |            |            |
|                              | SK <sup>20</sup>                                      |              |             |               | 20            | 40          | 30          |             | 7-20       |               |            |            |             |            |            |
| <b>Other channels</b>        | TREK1 <sup>21</sup>                                   |              |             |               |               |             |             | 14          | 9          |               |            |            |             |            |            |
|                              | VRAC <sup>22</sup>                                    |              |             |               |               |             |             | 6           |            | 2             | 3          | 12         | 28          |            |            |
|                              | CFTR <sup>23</sup>                                    |              |             |               |               |             |             | 27          |            |               |            |            |             |            |            |
| <b>Transporters</b>          | Na <sup>+</sup> ,K <sup>+</sup> -ATPase <sup>24</sup> |              |             | 70            | 50            | 130         | 80          | 150         | >100       |               |            |            |             |            |            |
|                              | Ca <sup>2+</sup> -ATPase <sup>25</sup>                | ~200         |             |               |               | ~750        | ~500        |             |            |               |            |            |             |            |            |
|                              | ATP Synthase <sup>26</sup>                            |              |             |               |               | ~150        |             |             |            |               |            |            |             |            |            |
|                              | TH transporters <sup>27</sup>                         |              |             |               |               |             | >250        |             |            |               |            |            |             |            |            |
|                              | OCT2 transporter <sup>28</sup>                        |              |             |               | 0.4-<br>0.8   | 0.2-<br>0.3 | 0.3-<br>1.3 |             | 1-4        |               | 5-7        | 2.5-4      |             |            |            |
|                              | OCT3 transporter <sup>29</sup>                        |              |             |               | 19            | 11          | 5           |             | 22         |               | 7          | 12         |             |            |            |
|                              | GLUT1 <sup>30</sup>                                   |              |             | 1430          | 980           | 560         | 720         |             |            |               |            |            |             |            |            |

|                       |                              |  |  |  |  |     |    |  |     |     |     |     |     |     |  |
|-----------------------|------------------------------|--|--|--|--|-----|----|--|-----|-----|-----|-----|-----|-----|--|
|                       | P-glycoprotein <sup>31</sup> |  |  |  |  |     |    |  | 116 |     | 32  | 30  |     |     |  |
| <b>Other proteins</b> | $\sigma_1$ <sup>32</sup>     |  |  |  |  | 0.3 | 2  |  | 0.2 | 2.4 | .06 | 1.9 | .04 | 0.3 |  |
|                       | $\sigma_2$ <sup>33</sup>     |  |  |  |  | 2   | 11 |  | 16  | 35  | 5   | 23  | 8   | 5   |  |



- 
- <sup>1</sup> (Yeung et al., 1999; Punke and Friederich, 2007)
- <sup>2</sup> (Choi et al., 1999)
- <sup>3</sup> (Choi et al., 2003)
- <sup>4</sup> (Lee et al., 2016; 2010a; b)
- <sup>5</sup> (Choi et al., 2001; Sung et al., 2008)
- <sup>6</sup> (Punke and Friederich, 2007)
- <sup>7</sup> (Jo et al., 2000; Milnes et al., 2003; Rajamani et al., 2006; Hong et al., 2010; Friemel and Zünkler, 2010; Staudacher et al., 2011)
- <sup>8</sup> (Choi et al., 1992; Park et al., 1999; Deák et al., 2000; Hamplová-Peichlová et al., 2002; Magyar et al., 2004; Traboulsie et al., 2006; Zahradník et al., 2008)
- <sup>9</sup> (Song et al., 2012)
- <sup>10</sup> (Lenkey et al., 2006; Dick et al., 2007; Horishita et al., 2017)
- <sup>11</sup> (Lenkey et al., 2006; Thériault et al., 2015; Nakatani and Amano, 2018)
- <sup>12</sup> (Kobayashi et al., 2003; 2004a; 2006; 2004b; Takahashi et al., 2006)
- <sup>13</sup> (Ohno et al., 2007; Su et al., 2007; Furutani et al., 2009)
- <sup>14</sup> (Robinson et al., 2003)
- <sup>15</sup> (Watanabe et al., 1993; Tohda et al., 1995; Szasz et al., 2007; Kiss et al., 2012; Barygin et al., 2017)
- <sup>16</sup> (Barygin et al., 2017)
- <sup>17</sup> (Schofield et al., 1981; Rana et al., 1993; García-Colunga et al., 1997; Fryer and Lukas, 1999; Hennings et al., 1999; López-Valdés and García-Colunga, 2001; Gumilar et al., 2003; Freysoldt et al., 2009; Arias et al., 2010c; b; 2010a; Weber et al., 2013)
- <sup>18</sup> (Oláh et al., 2007)
- <sup>19</sup> (Nojimoto et al., 2010)
- <sup>20</sup> (Terstappen et al., 2001; 2003)
- <sup>21</sup> (Kennard et al., 2005)
- <sup>22</sup> (Maertens et al., 1999; 2002)
- <sup>23</sup> (Maertens et al., 1999)
- <sup>24</sup> (Carfagna and Muhoberac, 1993; Zanatta et al., 2001)
- <sup>25</sup> (Plenge-Tellechea et al., 1999; Soler et al., 2000)
- <sup>26</sup> (Weinbach et al., 1986)
- <sup>27</sup> (Roth et al., 2010)
- <sup>28</sup> (Wang et al., 2014)
- <sup>29</sup> (Zhu et al., 2012)
- <sup>30</sup> (Pinkofsky et al., 2000)
- <sup>31</sup> (Weiss et al., 2003)

---

<sup>32</sup> (Narita et al., 1996)

<sup>33</sup> (Narita et al., 1996)

Table S2: TCA and SSRI structures and physicochemical properties<sup>34</sup>

TCA – Amitriptyline and derivatives (pKa / clogP<sub>o,w</sub>):

Amitriptyline (9.2 / 4.7)

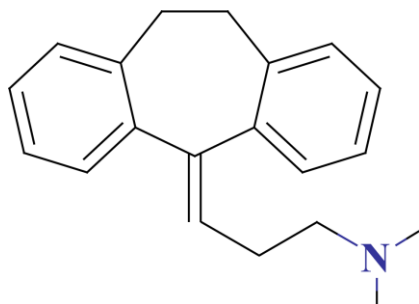

Nortriptyline (10 / 4.8)

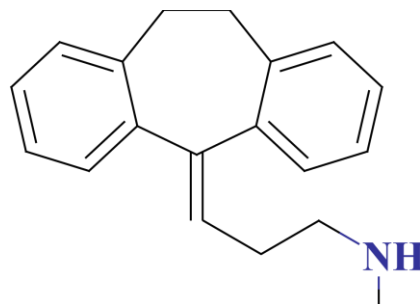

Protriptyline (10.6 / 4.7)

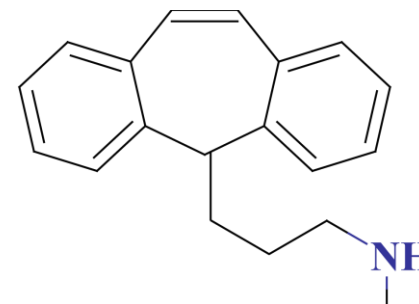

Doxepin (9.2 / 4.3)

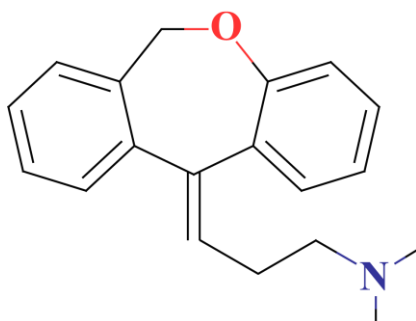

Dothiepin (9.1 / 4.7)

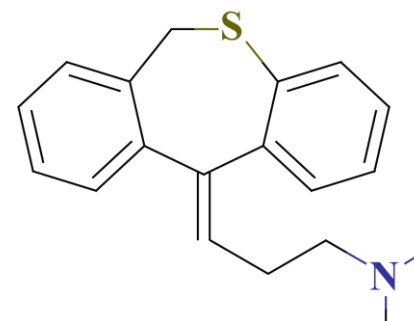

Table S2 continued: TCAs – Imipramine and derivatives (pKa / clogP<sub>o,w</sub>):

Imipramine (9.5 / 3.7)

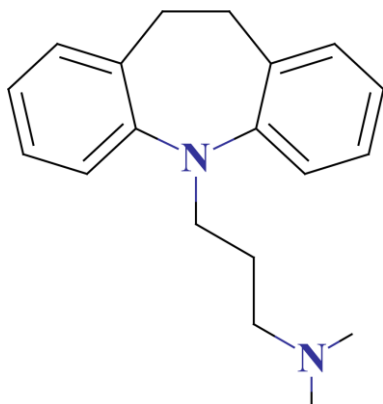

Desipramine (10.4 / 4.3)

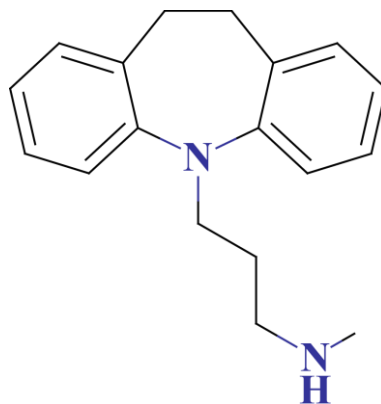

Lofepramine (6.5 / 6.3)

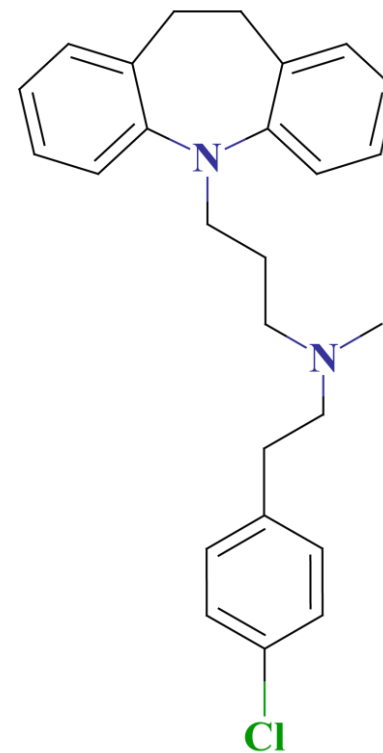

Clomipramine (9.5 / 5.3)

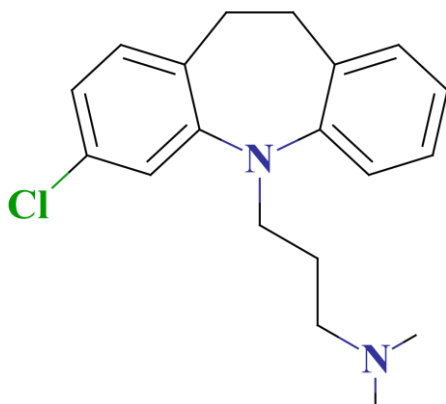

Trimipramine (9.4 / 5.0)

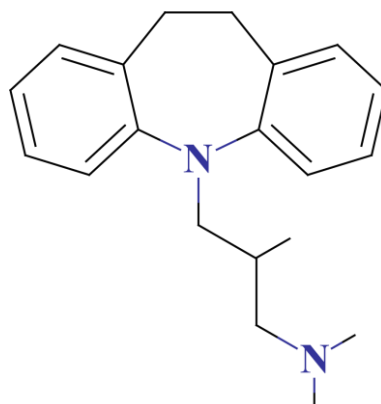

Table S2 continued: SSRIs (pKa / clogP<sub>o,w</sub>):

Citalopram (S+)

(9.6 / 3.4)

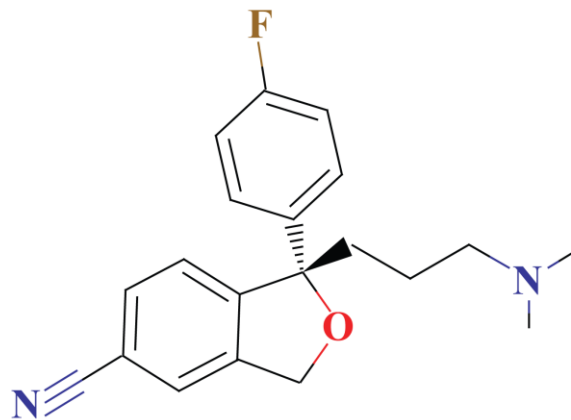

Citalopram (R-)

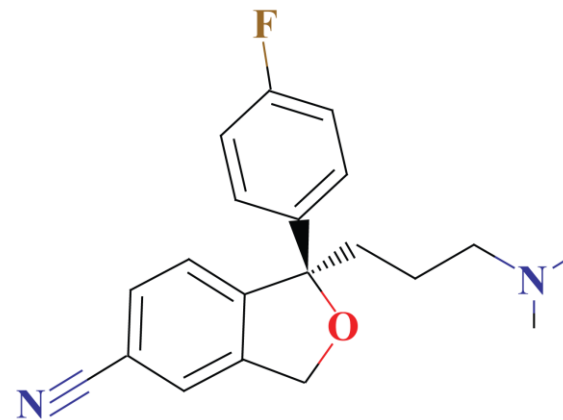

Fluoxetine (S+)

(10.1 / 4.3)

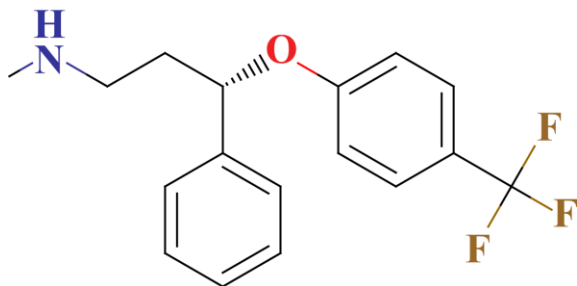

Fluoxetine (R-)

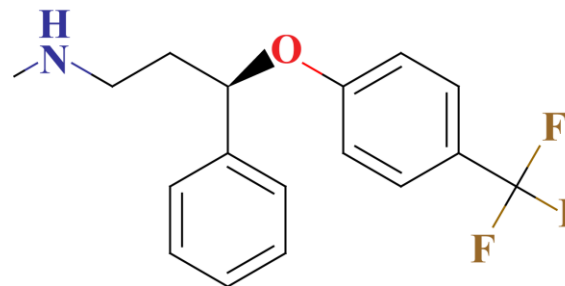

Table S2 continued: SSRIs (pKa / clogP<sub>o,w</sub>):

Paroxetine (9.7 / 3.7)

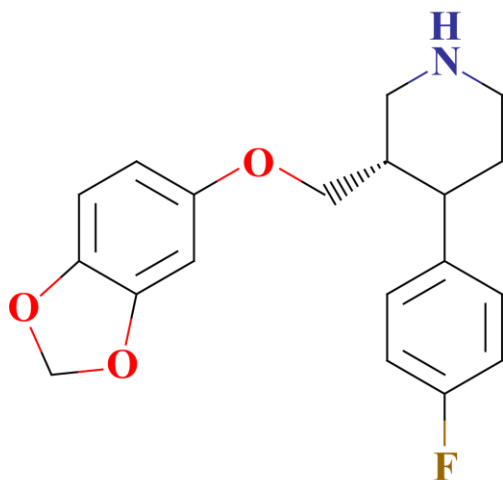

Sertraline (9.5 / 5.2)

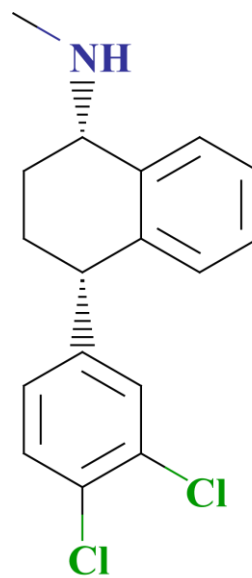

Fluvoxamine (9.4 / 3.0)

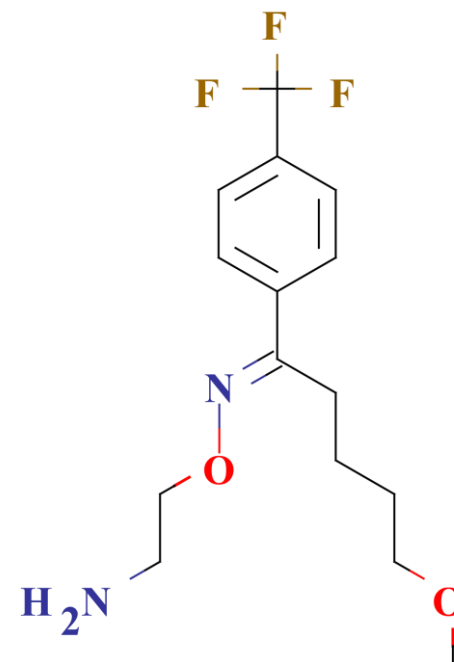

Table S2 continued: SSRIs (pKa / clogP):

Alaproclate (7.8 / 2.9)

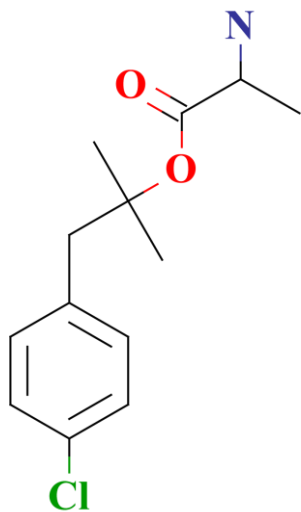

Zimelidine (7.9 / 3.7)

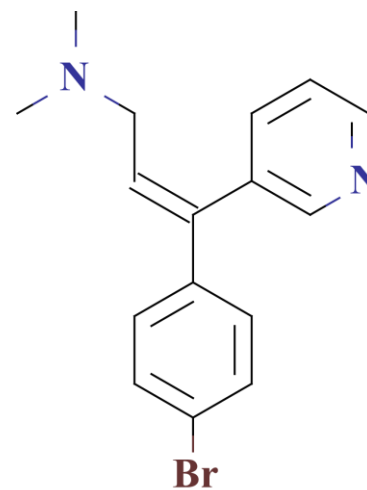

<sup>34</sup> clogP determined using the ACD/Percepta PhysChem Suite (<https://www.acdlabs.com/products/percepta/>, (ACD/Percepta PhysChem Suite, 2012) accessed December 20, 2018)

## References

- ACD/Percepta PhysChem Suite. 2012. ACD/Percepta PhysChem Suite. Available at: <https://www.acdlabs.com/products/percepta/> (accessed December 19, 2018).
- Arias, H.R., D. Feuerbach, K.M. Targowska-Duda, M. Russell, and K. Jozwiak. 2010b. Interaction of selective serotonin reuptake inhibitors with neuronal nicotinic acetylcholine receptors. *Biochemistry*. 49:5734–5742. <https://doi.org/10.1021/bi100536t>
- Arias, H.R., D. Feuerbach, P. Bhumireddy, and M.O. Ortells. 2010c. Inhibitory mechanisms and binding site location for serotonin selective reuptake inhibitors on nicotinic acetylcholine receptors. *Int. J. Biochem. Cell Biol.* 42:712–724. <https://doi.org/10.1016/j.biocel.2010.01.007>
- Arias, H.R., A. Rosenberg, K.M. Targowska-Duda, D. Feuerbach, K. Jozwiak, R. Moaddel, and I.W. Wainer. 2010a. Tricyclic antidepressants and mecamylamine bind to different sites in the human  $\alpha 4\beta 2$  nicotinic receptor ion channel. *Int. J. Biochem. Cell Biol.* 42:1007–1018. <https://doi.org/10.1016/j.biocel.2010.03.002>
- Aveyard, R., and D.A. Haydon. 1973. *An Introduction to the Principles of Surface Chemistry*. Cambridge University Press, London. 1 pp.
- Barygin, O.I., E.I. Nagaeva, D.B. Tikhonov, D.A. Belinskaya, N.P. Vanchakova, and N.N. Shestakova. 2017. Inhibition of the NMDA and AMPA receptor channels by antidepressants and antipsychotics. *Brain Res.* 1660:58–66. <https://doi.org/10.1016/j.brainres.2017.01.028>
- Bean, R.C., W.C. Shepherd, and H. Chan. 1968. Permeability of lipid bilayer membranes to organic solutes. *J. Gen. Physiol.* 52:495–508.
- Bruno, M.J., R.E. Koeppe, and O.S. Andersen. 2007. Docosahexaenoic acid alters bilayer elastic properties. *Proc. Natl. Acad. Sci. U S A.* 104:9638–9643. <https://doi.org/10.1073/pnas.0701015104>
- Carfagna, M.A., and B.B. Muhoberac. 1993. Interaction of tricyclic drug analogs with synaptic plasma membranes: structure-mechanism relationships in inhibition of neuronal  $\text{Na}^+/\text{K}^+$ -ATPase activity. *Mol. Pharmacol.* 44:129–141.
- Choi, B.H., J.S. Choi, S.-H. Yoon, D.-J. Rhie, D.S. Min, Y.-H. Jo, M.-S. Kim, and S.J. Hahn. 2001. Effects of norfluoxetine, the major metabolite of fluoxetine, on the cloned neuronal potassium channel Kv3.1. *Neuropharmacology*. 41:443–453.
- Choi, B.H., J.-S. Choi, H.S. Ahn, M.-J. Kim, D.-J. Rhie, S.-H. Yoon, D.-S. Min, Y.-H. Jo, M.-S. Kim, and S.J. Hahn. 2003. Fluoxetine blocks cloned neuronal A-type  $\text{K}^+$  channels Kv1.4. *Neuroreport*. 14:2451–2455. <https://doi.org/10.1097/01.wnr.0000095489.38740.cb>
- Choi, J.J., G.J. Huang, E. Shafik, W.H. Wu, and J.J. McArdle. 1992. Imipramine's selective suppression of an L-type calcium channel in neurons of murine dorsal root ganglia involves G proteins. *J. Pharmacol. Exp. Ther.* 263:49–53.
- Choi, J.S., S.J. Hahn, D.-J. Rhie, S.-H. Yoon, Y.-H. Jo, and M.-S. Kim. 1999. Mechanism of fluoxetine block of cloned voltage-activated potassium channel Kv1.3. *J. Pharmacol. Exp. Ther.* 291:1–6.
- Deák, F., B. Lasztóczy, P. Pacher, G.L. Petheő, Valéria Kecskeméti, and A. Spät. 2000. Inhibition of voltage-gated calcium channels by fluoxetine in rat hippocampal pyramidal cells. *Neuropharmacology*. 39:1029–1036.
- Dick, I.E., R.M. Brochu, Y. Purohit, G.J. Kaczorowski, W.J. Martin, and B.T. Priest. 2007. Sodium channel blockade may contribute to the analgesic efficacy of antidepressants. *J. Pain*. 8:315–324. <https://doi.org/10.1016/j.jpain.2006.10.001>
- Freyssoldt, A., J. Fleckenstein, P.M. Lang, D. Irnich, P. Grafe, and R.W. Carr. 2009. Low concentrations of amitriptyline inhibit nicotinic receptors in unmyelinated axons of human peripheral nerve. *Br. J. Pharmacol.* 158:797–805. <https://doi.org/10.1111/j.1476-5381.2009.00347.x>
- Friemel, A., and B.J. Zünkler. 2010. Interactions at human ether-à-go-go-related gene channels. *Toxicol. Sci.* 114:346–355. <https://doi.org/10.1093/toxsci/kfq011>
- Fryer, J.D., and R.J. Lukas. 1999. Antidepressants noncompetitively inhibit nicotinic acetylcholine receptor function. *J. Neurochem.* 72:1117–1124.
- Furutani, K., Y. Ohno, A. Inanobe, H. Hibino, and Y. Kurachi. 2009. Mutational and in silico analyses for antidepressant block of astroglial inward-rectifier Kir4.1 channel. *Mol. Pharmacol.* 75:1287–1295. <https://doi.org/10.1124/mol.108.052936>
- García-Colunga, J., J.N. Awad, and R. Miledi. 1997. Blockage of muscle and neuronal nicotinic acetylcholine receptors by fluoxetine (Prozac). *Proc. Natl. Acad. Sci. USA.* 94:2041–2044.
- Gumilar, F., H.R. Arias, G. Spitzmaul, and C. Bouzat. 2003. Molecular mechanisms of inhibition of nicotinic acetylcholine receptors by tricyclic antidepressants. *Neuropharmacology*. 45:964–976.
- Hamplová-Peichlová, J., J. Krůšek, I. Paclt, J. Slavíček, V. Lisá, and F. Vyskocil. 2002. Citalopram inhibits L-type calcium channel current in rat cardiomyocytes in culture. *Physiol. Res.* 51:317–321.
- Heerklotz, H., and A. Blume. 2012. Detergent interactions with lipid bilayers and membrane proteins. In *Comprehensive Biophysics*. E.H. Egelman, editor. Elsevier, Oxford. 63–91.
- Heerklotz, H., and S. Keller. 2013. How membrane partitioning modulates receptor activation: parallel versus serial effects of hydrophobic ligands. *Biophys. J.* 105:2607–2610. <https://doi.org/10.1016/j.bpj.2013.10.031>
- Heerklotz, H., and J. Seelig. 2000. Correlation of membrane/water partition coefficients of detergents with the critical micelle concentration. *Biophys. J.* 78:2435–2440. [https://doi.org/10.1016/S0006-3495\(00\)76787-7](https://doi.org/10.1016/S0006-3495(00)76787-7)
- Hennings, E.C., J.P. Kiss, K. De Oliveira, P.T. Toth, and E.S. Vizi. 1999. Nicotinic acetylcholine receptor antagonist activity of monoamine uptake blockers in rat hippocampal slices. *J. Neurochem.* 73:1043–1050.
- Hong, H.-K., M.-H. Park, B.H. Lee, and S.-H. Jo. 2010. Block of the human ether-à-go-go-related gene (hERG)  $\text{K}^+$  channel by the antidepressant desipramine. *Biochem. Biophys. Res. Commun.* 394:536–541. <https://doi.org/10.1016/j.bbrc.2010.03.010>
- Horishita, T., N. Yanagihara, S. Ueno, D. Okura, R. Horishita, T. Minami, Y. Ogata, Y. Sudo, Y. Uezono, T. Sata, and T. Kawasaki. 2017. Antidepressants inhibit  $\text{Na}_v1.3$ ,  $\text{Na}_v1.7$ , and  $\text{Na}_v1.8$  neuronal voltage-gated sodium channels more potently than  $\text{Na}_v1.2$  and  $\text{Na}_v1.6$  channels expressed in *Xenopus* oocytes. *Naunyn-Schmiedeberg's Arch. Pharmacol.* 390:1255–1270. <https://doi.org/10.1007/s00210-017-1424-x>
- Jo, S.H., J.B. Youm, C.O. Lee, Y.E. Earm, and W.K. Ho. 2000. Blockade of the HERG human cardiac  $\text{K}^+$  channel by the antidepressant drug amitriptyline. *Br. J. Pharmacol.* 129:1474–1480. <https://doi.org/10.1038/sj.bjp.0703222>
- Kennard, L.E., J.R. Chumbley, K.M. Ranatunga, S.J. Armstrong, E.L. Veale, and A. Mathie. 2005. Inhibition of the human two-pore domain potassium channel, TREK-1, by fluoxetine and its metabolite norfluoxetine. *Br. J. Pharmacol.* 144:821–829. <https://doi.org/10.1038/sj.bjp.0706068>
- Ketterer, B., B. Neumcke, and P. Läuger. 1971. Transport mechanism of hydrophobic ions through lipid bilayer membranes. *J. Membr. Biol.* 5:225–245. <https://doi.org/10.1007/BF01870551>
- Kiss, J.P., B.K. Szasz, L. Fodor, A. Mike, N. Lenkey, D. Kurkó, J. Nagy, and E.S. Vizi. 2012. GluN2B-containing NMDA receptors as possible targets for the neuroprotective and antidepressant effects of fluoxetine. *Neurochem. Int.* 60:170–176. <https://doi.org/10.1016/j.neuint.2011.12.005>
- Kobayashi, T., K. Washiyama, and K. Ikeda. 2003. Inhibition of G protein-activated inwardly rectifying  $\text{K}^+$  channels by fluoxetine (Prozac). *Br. J. Pharmacol.* 138:1119–1128. <https://doi.org/10.1038/sj.bjp.0705172>
- Kobayashi, T., K. Washiyama, and K. Ikeda. 2004a. Inhibition of G protein-activated inwardly rectifying  $\text{K}^+$  channels by various antidepressant drugs. *Neuropsychopharmacology*. 29:1841–1851. <https://doi.org/10.1038/sj.npp.1300484>
- Kobayashi, T., K. Washiyama, and K. Ikeda. 2004b. Modulators of G protein-activated inwardly rectifying  $\text{K}^+$  channels: potentially therapeutic agents for addictive drug users. *Ann. N. Y. Acad. Sci.* 1025:590–594. <https://doi.org/10.1196/annals.1316.073>
- Kobayashi, T., K. Washiyama, and K. Ikeda. 2006. Inhibition of G protein-activated inwardly rectifying  $\text{K}^+$  channels by the antidepressant paroxetine. *J. Pharmacol. Sci.* 102:278–287.
- Lee, H.M., S.J. Hahn, and B.H. Choi. 2010a. Inhibitory action of fluvoxamine on Kv1.5 currents. *Biol. Pharm. Bull.* 33:977–982.
- Lee, H.M., S.J. Hahn, and B.H. Choi. 2010b. Open channel block of Kv1.5 currents by citalopram. *Acta Pharmacol. Sin.* 31:429–435. <https://doi.org/10.1038/aps.2010.14>



- Lee, H.M., S.J. Hahn, and B.H. Choi. 2016. Blockade of Kv1.5 channels by the antidepressant drug sertraline. *Korean J. Physiol. Pharmacol.* 20:193–200. <https://doi.org/10.4196/kjpp.2016.20.2.193>
- Lenkey, N., R. Karoly, J.P. Kiss, B.K. Szasz, E.S. Vizi, and A. Mike. 2006. The mechanism of activity-dependent sodium channel inhibition by the antidepressants fluoxetine and desipramine. *Mol. Pharmacol.* 70:2052–2063. <https://doi.org/10.1124/mol.106.026419>
- López-Valdés, H.E., and J. García-Colunga. 2001. Antagonism of nicotinic acetylcholine receptors by inhibitors of monoamine uptake. *Mol. Psychiatry.* 6:511–519. <https://doi.org/10.1038/sj.mp.4000885>
- Maertens, C., L. Wei, T. Voets, G. Droogmans, and B. Nilius. 1999. Block by fluoxetine of volume-regulated anion channels. *Br. J. Pharmacol.* 126:508–514. <https://doi.org/10.1038/sj.bjp.0702314>
- Maertens, C., G. Droogmans, R. Verbesselt, and B. Nilius. 2002. Block of volume-regulated anion channels by selective serotonin reuptake inhibitors. *Naunyn-Schmiedeberg's Arch. Pharmacol.* 366:158–165. <https://doi.org/10.1007/s00210-002-0567-5>
- Magyar, J., N. Szentandrassy, T. Bányász, V. Kecskeméti, and P.P. Nánási. 2004. Effects of norfluoxetine on the action potential and transmembrane ion currents in canine ventricular cardiomyocytes. *Naunyn-Schmiedeberg's Arch. Pharmacol.* 370:203–210. <https://doi.org/10.1007/s00210-004-0954-1>
- McLaughlin, S., and H. Harary. 1976. The hydrophobic adsorption of charged molecules to bilayer membranes: a test of the applicability of the stern equation. *Biochemistry.* 15:1941–1948. <https://doi.org/10.1021/bi00654a023>
- Milnes, J.T., O. Crociani, A. Arcangeli, J.C. Hancox, and H.J. Witchel. 2003. Blockade of HERG potassium currents by fluvoxamine: incomplete attenuation by S6 mutations at F656 or Y652. *Br. J. Pharmacol.* 139:887–898. <https://doi.org/10.1038/sj.bjp.0705335>
- Nakatani, Y., and T. Amano. 2018. Functional Modulation of Na<sub>v</sub>1.2 Voltage-Gated Sodium Channels Induced by Escitalopram. *Biol. Pharm. Bull.* 41:1471–1474. <https://doi.org/10.1248/bpb.18-00214>
- Narita, N., K. Hashimoto, S. Tomitaka, and Y. Minabe. 1996. Interactions of selective serotonin reuptake inhibitors with subtypes of sigma receptors in rat brain. *Eur. J. Pharmacol.* 307:117–119.
- Nojimoto, F.D., A. Mueller, F. Hebel-Barbosa, J. Akinaga, V. Lima, L.R. Kiguti, and A.S. Pupo. 2010. The tricyclic antidepressants amitriptyline, nortriptyline and imipramine are weak antagonists of human and rat alpha1B-adrenoceptors. *Neuropharmacology.* 59:49–57. <https://doi.org/10.1016/j.neuropharm.2010.03.015>
- Ohno, Y., H. Hibino, C. Lossin, A. Inanobe, and Y. Kurachi. 2007. Inhibition of astroglial Kir4.1 channels by selective serotonin reuptake inhibitors. *Brain Res.* 1178:44–51. <https://doi.org/10.1016/j.brainres.2007.08.018>
- Oláh, Z., K. Jósavay, L. Pecze, T. Letoha, N. Babai, D. Budai, F. Otvös, S. Szalma, and C. Vizler. 2007. Anti-calmodulins and tricyclic adjuvants in pain therapy block the TRPV1 channel. *PLoS One.* 2:e545. <https://doi.org/10.1371/journal.pone.0000545>
- Park, K.S., I.D. Kong, K.C. Park, and J.W. Lee. 1999. Fluoxetine inhibits L-type Ca<sup>2+</sup> and transient outward K<sup>+</sup> currents in rat ventricular myocytes. *Yonsei Med. J.* 40:144–151.
- Peitzsch, R.M., and S. McLaughlin. 1993. Binding of acylated peptides and fatty acids to phospholipid vesicles: pertinence to myristoylated proteins. *Biochemistry.* 32:10436–10443.
- Pinkofsky, H.B., D.S. Dwyer, and R.J. Bradley. 2000. The inhibition of GLUT1 glucose transport and cytochalasin B binding activity by tricyclic antidepressants. *Life Sci.* 66:271–278.
- Plenge-Tellechea, F., F. Soler, and F. Fernandez-Belda. 1999. Tricyclic antidepressants inhibit the Ca<sup>2+</sup>-dependent ATPase activity from plasma membrane. *Arch. Biochem. Biophys.* 370:119–125. <https://doi.org/10.1006/abbi.1999.1375>
- Punke, M.A., and P. Friederich. 2007. Amitriptyline is a potent blocker of human Kv1.1 and Kv7.2/7.3 channels. *Anesth. Analg.* 104:1256–1264. <https://doi.org/10.1213/01.ane.0000260310.63117.a2>
- Rajamani, S., L.L. Eckhardt, C.R. Valdivia, C.A. Klemens, B.M. Gillman, C.L. Anderson, K.M. Holzem, B.P. Delisle, B.D. Anson, J.C. Makielski, and C.T. January. 2006. Drug-induced long QT syndrome: hERG K<sup>+</sup> channel block and disruption of protein trafficking by fluoxetine and norfluoxetine. *Br. J. Pharmacol.* 149:481–489. <https://doi.org/10.1038/sj.bjp.0706892>
- Rana, B., S.O. McMorn, H.L. Reeve, C.N. Wyatt, P.F. Vaughan, and C. Peers. 1993. Inhibition of neuronal nicotinic acetylcholine receptors by imipramine and desipramine. *Eur. J. Pharmacol.* 250:247–251.
- Robinson, R.T., B.C. Drafts, and J.L. Fisher. 2003. Fluoxetine increases GABA(A) receptor activity through a novel modulatory site. *J. Pharmacol. Exp. Ther.* 304:978–984. <https://doi.org/10.1124/jpet.102.044834>
- Roth, S., A. Kinne, and U. Schweizer. 2010. The tricyclic antidepressant desipramine inhibits T3 import into primary neurons. *Neurosci. Lett.* 478:5–8. <https://doi.org/10.1016/j.neulet.2010.04.055>
- Schofield, G.G., B. Witkop, J.E. Warnick, and E.X. Albuquerque. 1981. Differentiation of the open and closed states of the ionic channels of nicotinic acetylcholine receptors by tricyclic antidepressants. *Proc. Natl. Acad. Sci. U S A.* 78:5240–5244.
- Seelig, J., S. Nebel, P. Ganz, and C. Bruns. 1993. Electrostatic and nonpolar peptide-membrane interactions. Lipid binding and functional properties of somatostatin analogues of charge z = +1 to z = +3. *Biochemistry.* 32:9714–9721.
- Soler, F., F. Plenge-Tellechea, I. Fortea, and F. Fernandez-Belda. 2000. Clomipramine and related structures as inhibitors of the skeletal sarcoplasmic reticulum Ca<sup>2+</sup> pump. *J. Bioenerg. Biomembr.* 32:133–142.
- Song, J.-H., W. Marszalec, L. Kai, J.Z. Yeh, and T. Narahashi. 2012. Antidepressants inhibit proton currents and tumor necrosis factor- $\alpha$  production in BV2 microglial cells. *Brain Res.* 1435:15–23. <https://doi.org/10.1016/j.brainres.2011.11.041>
- Staudacher, I., L. Wang, X. Wan, S. Obers, W. Wenzel, F. Tristram, R. Koschny, K. Staudacher, J. Kisselbach, P. Koelsch, et al. 2011. hERG K<sup>+</sup> channel-associated cardiac effects of the antidepressant drug desipramine. *Naunyn-Schmiedeberg's Arch. Pharmacol.* 383:119–139. <https://doi.org/10.1007/s00210-010-0583-9>
- Su, S., Y. Ohno, C. Lossin, H. Hibino, A. Inanobe, and Y. Kurachi. 2007. Inhibition of astroglial inwardly rectifying Kir4.1 channels by a tricyclic antidepressant, nortriptyline. *J. Pharmacol. Exp. Ther.* 320:573–580. <https://doi.org/10.1124/jpet.106.112094>
- Sung, M.J., H.S. Ahn, S.J. Hahn, and B.H. Choi. 2008. Open channel block of Kv3.1 currents by fluoxetine. *J. Pharmacol. Sci.* 106:38–45.
- Szasz, B.K., A. Mike, R. Karoly, Z. Gerevich, P. Illes, E.S. Vizi, and J.P. Kiss. 2007. Direct inhibitory effect of fluoxetine on N-methyl-D-aspartate receptors in the central nervous system. *Biol. Psychiatry.* 62:1303–1309. <https://doi.org/10.1016/j.biopsych.2007.04.014>
- Takahashi, T., T. Kobayashi, M. Ozaki, Y. Takamatsu, Y. Ogai, M. Ohta, H. Yamamoto, and K. Ikeda. 2006. G protein-activated inwardly rectifying K<sup>+</sup> channel inhibition and rescue of weaver mouse motor functions by antidepressants. *Neurosci. Res.* 54:104–111. <https://doi.org/10.1016/j.neures.2005.10.012>
- Tamm, L.K. 1991. Membrane insertion and lateral mobility of synthetic amphiphilic signal peptides in lipid model membranes. *Biochim. Biophys. Acta.* 1071:123–148. [https://doi.org/10.1016/0304-4157\(91\)90021-N](https://doi.org/10.1016/0304-4157(91)90021-N)
- Tan, A., A. Ziegler, B. Steinbauer, and J. Seelig. 2002. Thermodynamics of sodium dodecyl sulfate partitioning into lipid membranes. *Biophys. J.* 83:1547–1556. [https://doi.org/10.1016/S0006-3495\(02\)73924-6](https://doi.org/10.1016/S0006-3495(02)73924-6)
- Terstappen, G.C., G. Pula, C. Carignani, M.X. Chen, and R. Roncarati. 2001. Pharmacological characterisation of the human small conductance calcium-activated potassium channel hSK3 reveals sensitivity to tricyclic antidepressants and antipsychotic phenothiazines. *Neuropharmacology.* 40:772–783.
- Terstappen, G.C., A. Pellacani, L. Aldegheri, F. Graziani, C. Carignani, G. Pula, and C. Virginio. 2003. The antidepressant fluoxetine blocks the human small conductance calcium-activated potassium channels SK1, SK2 and SK3. *Neurosci. Lett.* 346:85–88.
- Thériault, O., H. Poulin, J.-M. Beaulieu, and M. Chahine. 2015. Differential modulation of Nav1.7 and Nav1.8 channels by antidepressant drugs. *Eur. J. Pharmacol.* 764:395–403. <https://doi.org/10.1016/j.ejphar.2015.06.053>
- Tohda, M., H. Urushihara, and Y. Nomura. 1995. Inhibitory effects of antidepressants on NMDA-induced currents in *Xenopus* oocytes injected with rat brain RNA. *Neurochem. Int.* 26:53–58.

- Traboulsie, A., J. Chemin, E. Kupfer, J. Nargeot, and P. Lory. 2006. T-type calcium channels are inhibited by fluoxetine and its metabolite norfluoxetine. *Mol. Pharmacol.* 69:1963–1968. <https://doi.org/10.1124/mol.105.020842>
- Wang, K., S. Sun, L. Li, M. Tu, and H. Jiang. 2014. Involvement of organic cation transporter 2 inhibition in potential mechanisms of antidepressant action. *Prog. Neuropsychopharmacol. Biol. Psychiatry.* 53:90–98. <https://doi.org/10.1016/j.pnpbp.2014.03.005>
- Watanabe, Y., H. Saito, and K. Abe. 1993. Tricyclic antidepressants block NMDA receptor-mediated synaptic responses and induction of long-term potentiation in rat hippocampal slices. *Neuropharmacology.* 32:479–486.
- Weber, M.L., C.M. Hofland, C.L. Shaffer, G. Flik, T. Cremers, R.S. Hurst, and H. Rollema. 2013. Therapeutic doses of antidepressants are projected not to inhibit human  $\alpha 4\beta 2$  nicotinic acetylcholine receptors. *Neuropharmacology.* 72:88–95. <https://doi.org/10.1016/j.neuropharm.2013.04.027>
- Weinbach, E.C., J.L. Costa, B.D. Nelson, C.E. Claggett, T. Hundal, D. Bradley, and S.J. Morris. 1986. Effects of tricyclic antidepressant drugs on energy-linked reactions in mitochondria. *Biochem. Pharmacol.* 35:1445–1451.
- Weiss, J., S.-M.G. Dormann, M. Martin-Facklam, C.J. Kerpen, N. Ketabi-Kiyavash, and W.E. Haefeli. 2003. Inhibition of P-glycoprotein by newer antidepressants. *J. Pharmacol. Exp. Ther.* 305:197–204. <https://doi.org/10.1124/jpet.102.046532>
- Wenk, M.R., T. Alt, A. Seelig, and J. Seelig. 1997. Octyl-beta-D-glucopyranoside partitioning into lipid bilayers: thermodynamics of binding and structural changes of the bilayer. *Biophys. J.* 72:1719–1731. [https://doi.org/10.1016/S0006-3495\(97\)78818-0](https://doi.org/10.1016/S0006-3495(97)78818-0)
- White, S.H., W.C. Wimley, A.S. Ladokhin, and K. Hristova. 1998. Protein folding in membranes: determining energetics of peptide-bilayer interactions. *Methods Enzymol.* 295:62–87.
- Yeung, S.Y., J.A. Millar, and A. Mathie. 1999. Inhibition of neuronal KV potassium currents by the antidepressant drug, fluoxetine. *Br. J. Pharmacol.* 128:1609–1615. <https://doi.org/10.1038/sj.bjp.0702955>
- Yu, H., E.J. Dickson, S.-R. Jung, D.-S. Koh, and B. Hille. 2016. High membrane permeability for melatonin. *J. Gen. Physiol.* 147:63–76. <https://doi.org/10.1085/jgp.201511526>
- Zahradník, I., I. Minarovic, and A. Zahradníková. 2008. Inhibition of the cardiac L-type calcium channel current by antidepressant drugs. *J. Pharmacol. Exp. Ther.* 324:977–984. <https://doi.org/10.1124/jpet.107.132456>
- Zanatta, L.M., F.C. Nascimento, S.V. Barros, G.R. Silva, A.I. Zugno, C.A. Netto, and A.T. Wyse. 2001. In vivo and in vitro effect of imipramine and fluoxetine on Na<sup>+</sup>,K<sup>+</sup>-ATPase activity in synaptic plasma membranes from the cerebral cortex of rats. *Braz. J. Med. Biol. Res.* 34:1265–1269.
- Zhu, H.-J., D.I. Appel, D. Gründemann, E. Richelson, and J.S. Markowitz. 2012. Evaluation of organic cation transporter 3 (SLC22A3) inhibition as a potential mechanism of antidepressant action. *Pharmacol. Res.* 65:491–496. <https://doi.org/10.1016/j.phrs.2012.01.008>
